# Supplementary material for: Low-Dose Vertical Inhibition of the RAF-MEK-ERK Cascade Causes Apoptotic Death of KRAS Mutant Cancers
Source: PubMed Central journal article supplement — Cell Rep. Author manuscript; Available in PMC 2020 Jul 31. (PMC7393480; doi:10.1016/j.celrep.2020.107764), 2020-06-16
Supplement: NIHMS1604816-supplement-1.pdf [file NIHMS1604816-supplement-1.pdf]

## Supplemental Information

### Low-Dose Vertical Inhibition of the RAF-MEK-ERK Cascade Causes Apoptotic Death of KRAS Mutant Cancers

Irem Ozkan-Dagliyan, J. Nathaniel Diehl, Samuel D. George, Antje Schaefer, Bjoern Papke, Kathleen Klotz-Noack, Andrew M. Waters, Craig M. Goodwin, Prson Gautam, Mariaelena Pierobon, Sen Peng, Thomas S.K. Gilbert, Kevin H. Lin, Onur Dagliyan, Krister Wennerberg, Emanuel F. Petricoin III, Nhan L. Tran, Shripad V. Bhagwat, Ramon V. Tiu, Sheng-Bin Peng, Laura E. Herring, Lee M. Graves, Christine Sers, Kris C. Wood, Adrienne D. Cox, and Channing J. Der

Figure S1

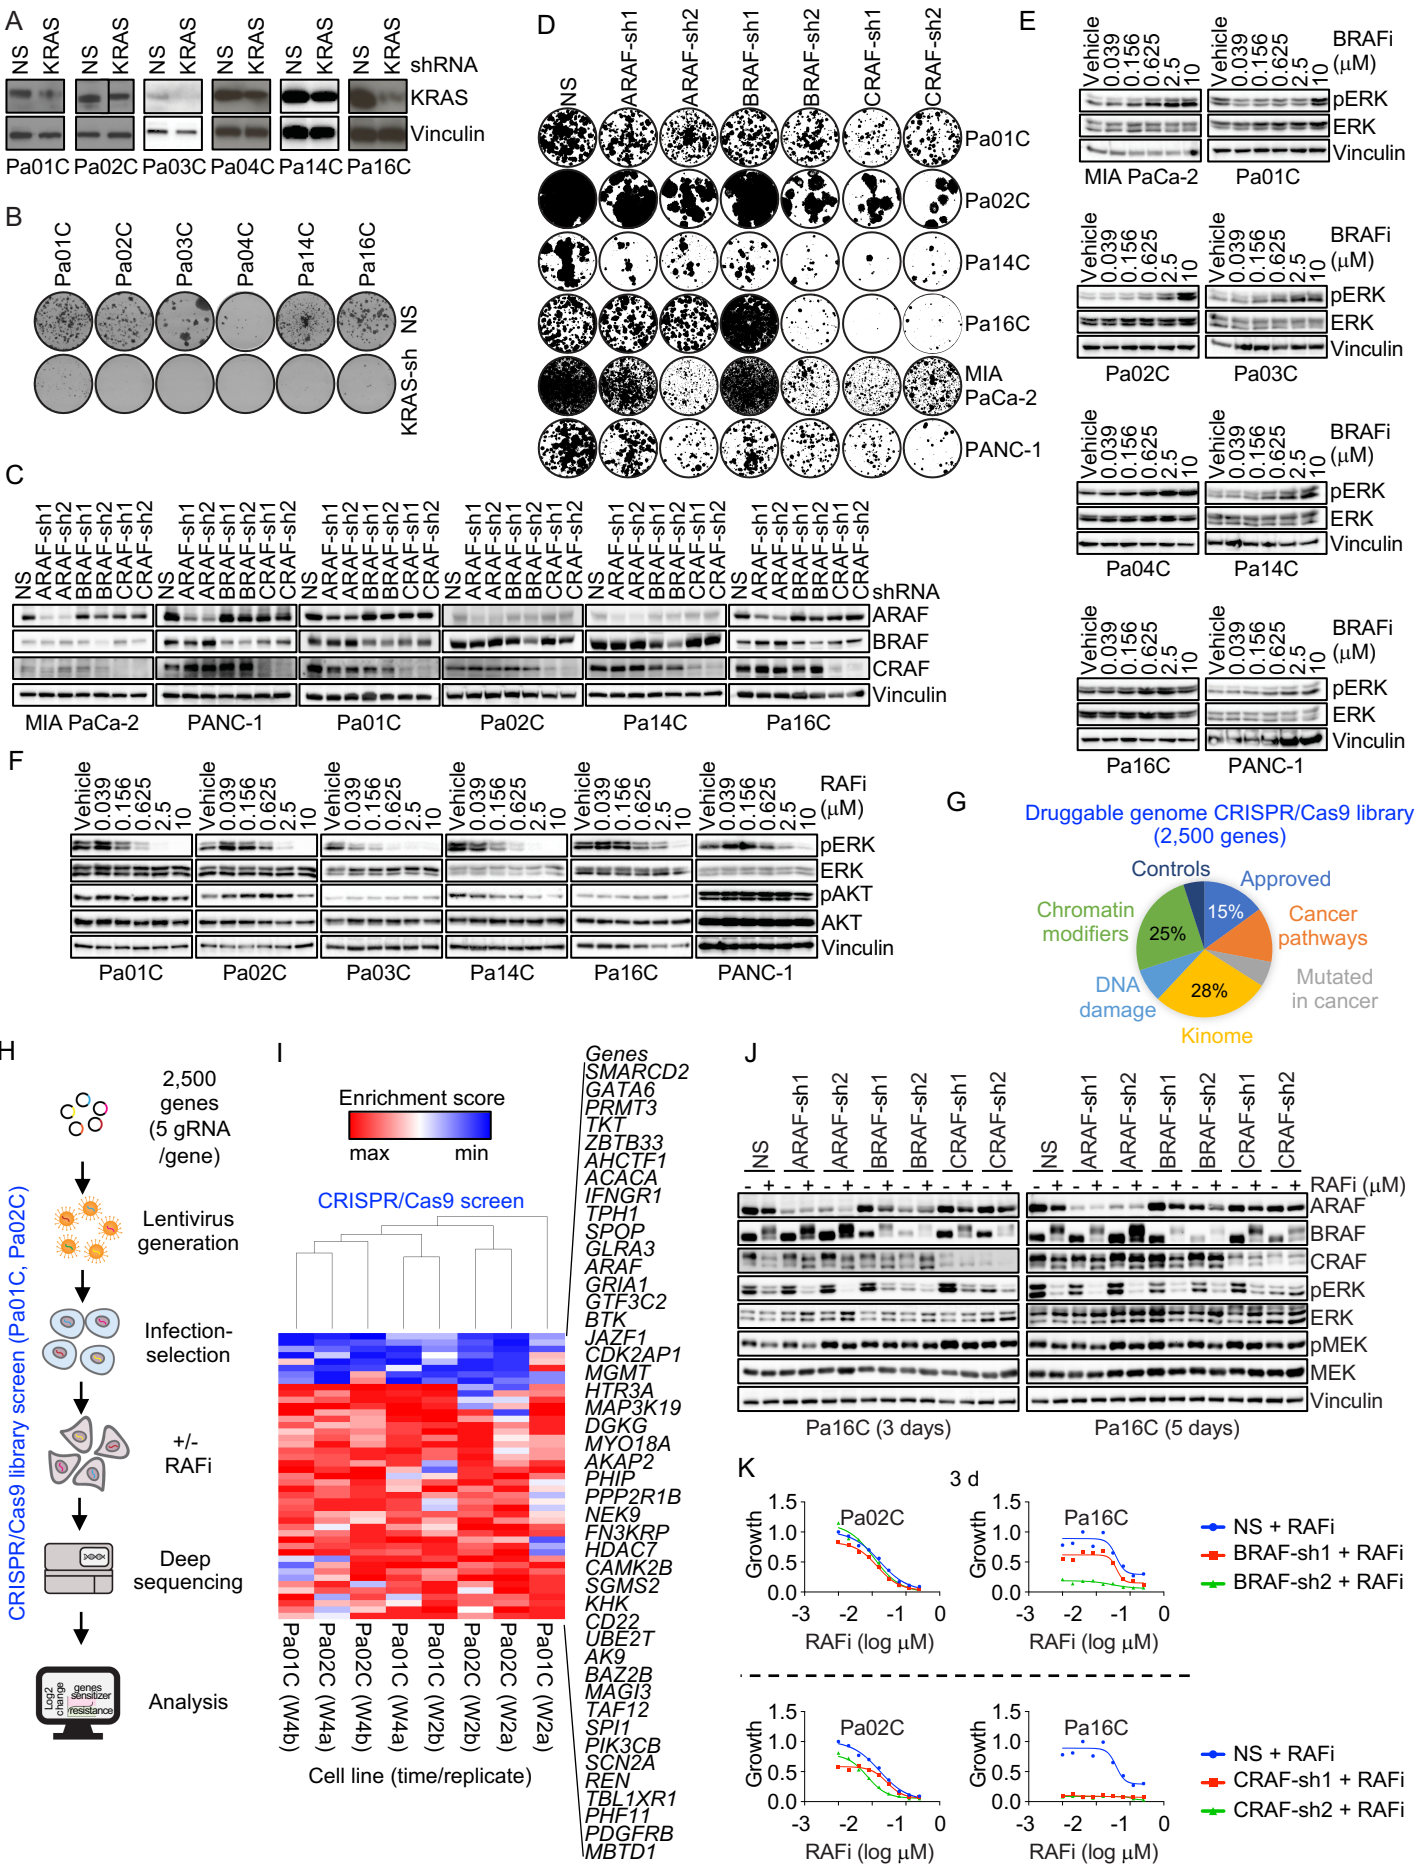



**Figure S1. All RAF Isoforms are Necessary for PDAC Growth, Related to Figure 1**

- (A) *KRAS* mutant PDAC cell lines were infected by lentivirus vectors encoding nonspecific (NS) control or *KRAS* shRNA (72 hr). Cell lysates were immunoblotted to determine levels of *KRAS* and vinculin (control for total protein).
- (B) PDAC cell lines were infected by lentivirus vectors encoding NS control or *KRAS* shRNAs (72 hr) and colonies were stained with crystal violet ~10 days after plating. Representative images are shown.
- (C) PDAC cell lines were infected by lentivirus vectors encoding NS control or two shRNAs targeting *ARAF*, *BRAF* or *CRAF* (72 hr). Cell lysates were immunoblotted to determine levels of *ARAF*, *BRAF*, *CRAF* and vinculin.
- (D) PDAC cell lines were infected by lentivirus vectors encoding NS control, *ARAF*, *BRAF* or *CRAF* shRNAs (72 hr). Colonies were stained by crystal violet ~10 days after plating. Representative images are shown.
- (E) PDAC cell lines were treated with mutant BRAF-specific inhibitor vemurafenib (BRAFi, 0.04-10  $\mu$ M, 72 hr). Cell lysates were immunoblotted to determine levels of phosphorylated ERK, total ERK and vinculin.
- (F) PDAC cell lines were treated with the pan-RAF inhibitor LY3009120 (RAFi, 0.04-10  $\mu$ M, 72 hr). Cell lysates were immunoblotted to determine levels of phosphorylated ERK, total ERK, phosphorylated AKT, total AKT and vinculin.
- (G) The composition of the loss-of-function CRISPR/Cas9 druggable genome (2,500 genes) library screen.
- (H) CRISPR/Cas9 druggable genome library screen schematic.
- (I) CRISPR screen. PDAC cell lines were infected with a pooled CRISPR library and treated with vehicle control or RAFi (w2: 2 weeks, w4: 4 weeks; a and b indicate replicate samples). The enrichment score indicates either enrichment (red) or depletion (blue) of barcoded sequences corresponding to the indicated genes in cells treated with RAFi relative to vehicle control.
- (J) Pa16C cells were infected by lentivirus vectors encoding NS control or two distinct shRNAs for *ARAF*, *BRAF* or *CRAF* for 72 hr, and treated with LY3009120 (RAFi, 0.3  $\mu$ M) for additional 72 or 120 hr (related to Figure 1E). Cell lysates were immunoblotted to determine levels of *ARAF*, *BRAF*, *CRAF*, phosphorylated ERK, total ERK, phosphorylated MEK (Ser 298), total MEK and vinculin.
- (K) Related to Figure 1E. Pa02C and Pa16C cell lines were infected by lentivirus vectors encoding NS or two distinct *BRAF* or *CRAF* shRNAs (72 hr) and treated with LY3009120 (RAFi, 0.01-2.5  $\mu$ M) for additional 120 hr. Proliferation was measured by Calcein AM cell viability assay. Data are the mean average of three technical replicates. Error bars are shown as  $\pm$  S.E.M.



**Figure S2. Drug Sensitivity Resistance Testing Screen (DSRT), Related to Figure 2**

A) Human or mouse *KRAS* mutant PDAC cell lines were treated with a 525-inhibitor library with or without LY3009120 (RAFi, 2  $\mu$ M, 72 hr). Proliferation was measured by Calcein AM viability assay. Drug sensitivity score ( $\delta$ DSS) was used to quantify inhibitor responses. Red (> additive), blue (< additive) or white (no effect).

(B) Human or mouse *KRAS* mutant PDAC cell lines were treated with a 525-inhibitor library with or without trametinib (MEKi, 0.025  $\mu$ M, 72 hr). Proliferation was measured by Calcein AM viability assay (left), and cell death was measured by CellTox Green cytotoxicity assay (right). Inhibitor responses were plotted as  $\delta$ DSS. Red (> additive), blue (< additive) or white (no effect).

(C) Human or mouse *KRAS* mutant PDAC cell lines were treated as described in Figure S2B with SCH772984 (ERKi, 0.1  $\mu$ M, 72 hr). Proliferation and cell death measured as described in Figure S2B.

(D) The composition of the DSRT screen.

(E) Top hits summarized for the RAFi, MEKi or ERKi DSRT viability and cytotoxicity screens.

Figure S3

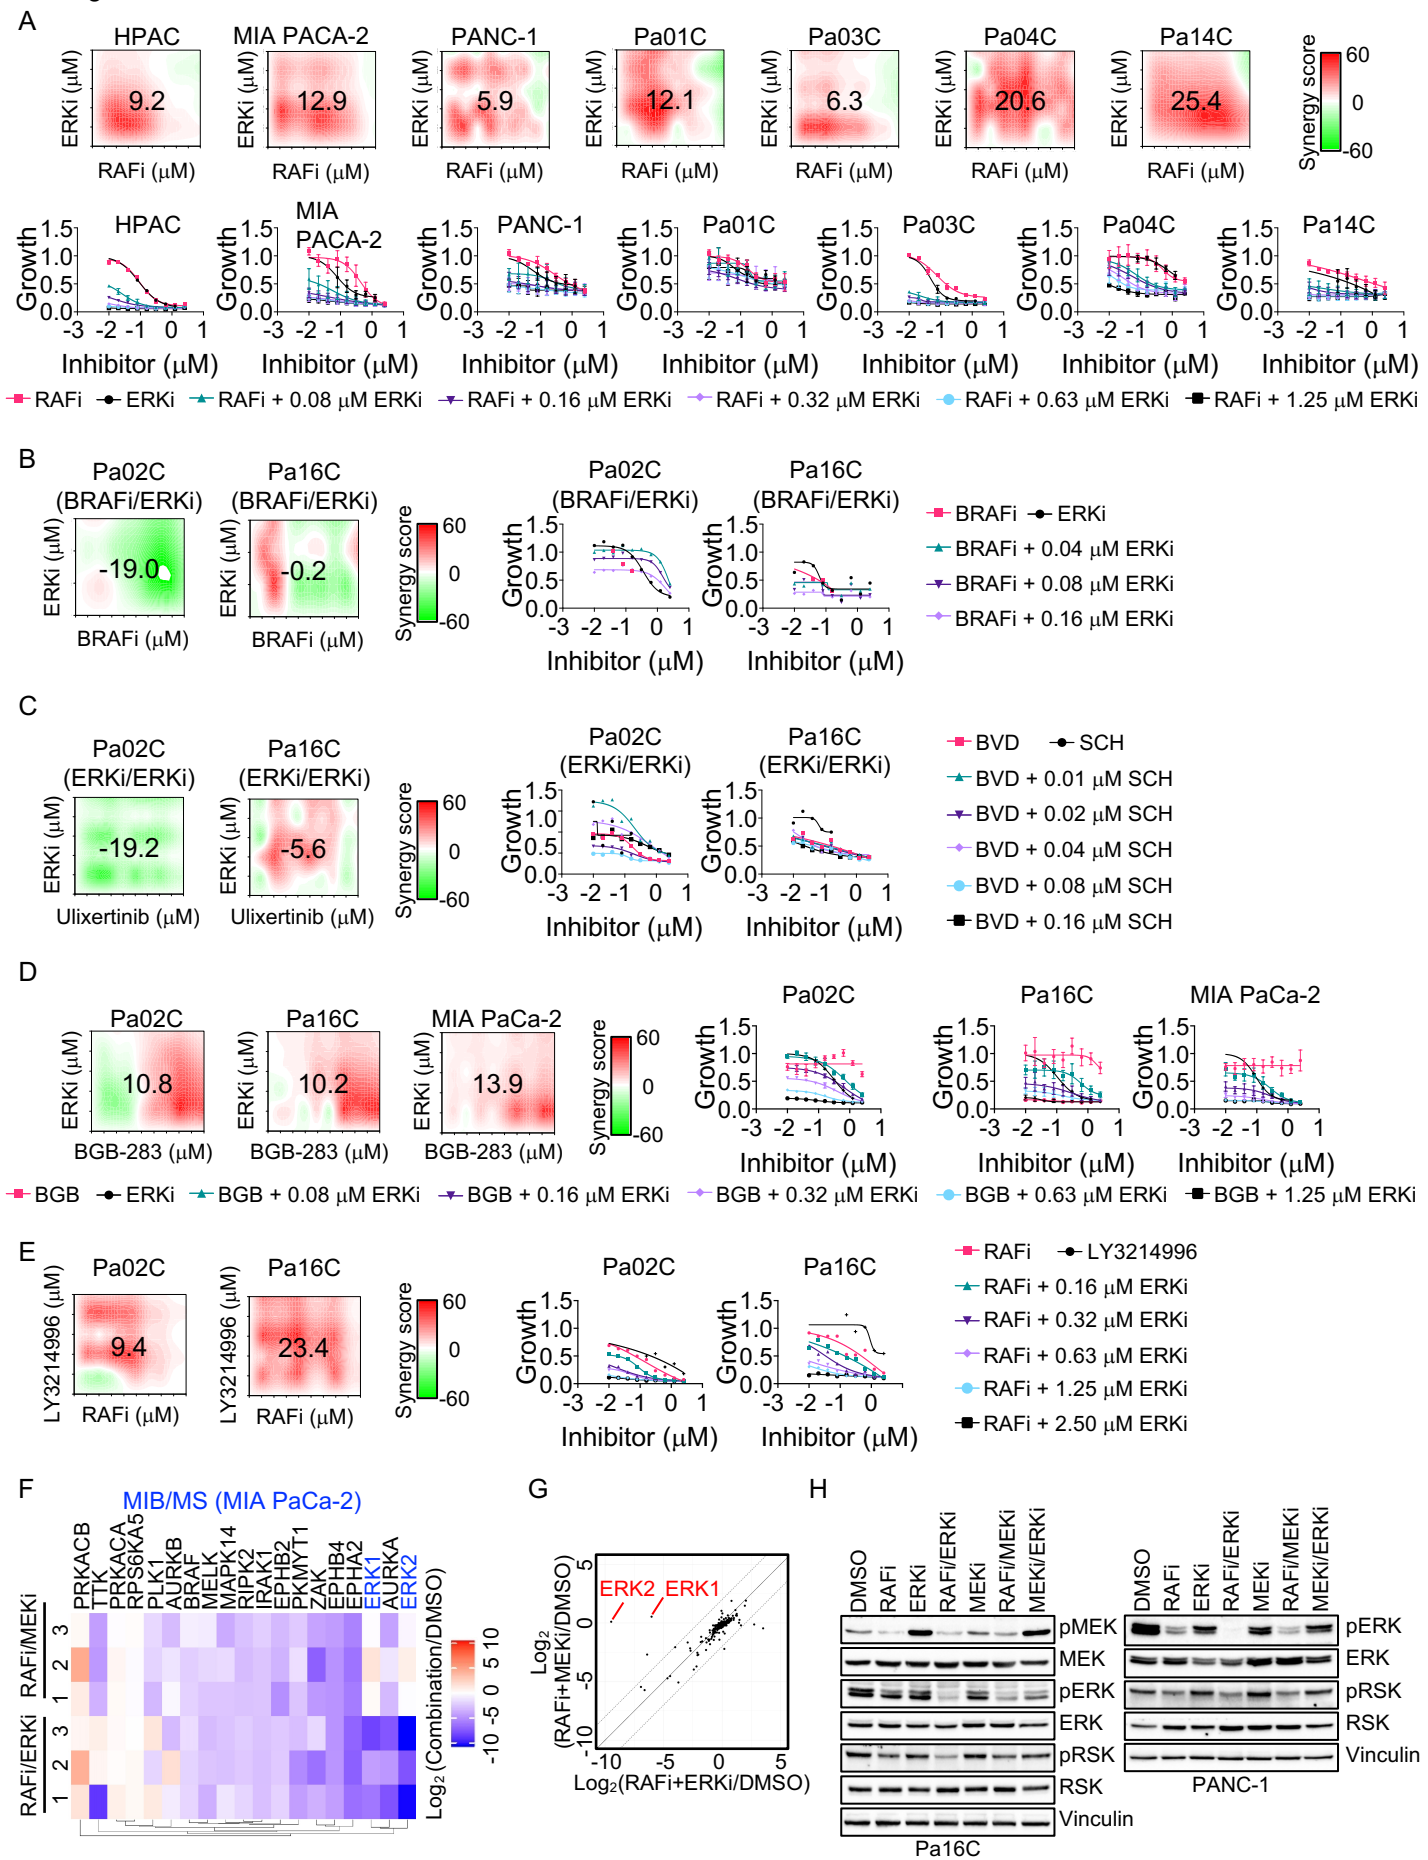

**Figure S3. Concurrent RAF and ERK Inhibition Causes Synergistic Growth Suppression, Related to Figure 2**

- (A) Indicated *KRAS* mutant PDAC cell lines were treated with the vehicle control (lower left of each graph), LY3009120 (RAFi, 0.01-2.5  $\mu$ M, 1:2 dilution) and SCH772984 (ERKi, 0.08-1.25  $\mu$ M, 1:2 dilution) alone or in combination for 120 hr. Proliferation was measured by Calcein AM cell viability assay. Representative bliss synergy score heatmaps of three biological replicates (up). Red (synergy), green (antagonism), white (no effect). Averaged synergy scores presented on the synergy heatmaps. Averaged dose response curves of three biological replicates (down). Error bars are shown as  $\pm$ S.E.M.
- (B) PDAC cell lines Pa02C and Pa16C were treated with the vehicle control (lower left of each graph), vemurafenib (BRAFi, 0.01-2.5  $\mu$ M, 1:2 dilution) and SCH772984 (ERKi, 0.08-1.25  $\mu$ M, 1:2 dilution) alone or in combination for 120 hr. Bliss synergy scores and dose response curves are calculated as in Figure S2F.
- (C) Pa02C and Pa16C were treated with the vehicle control (lower left of each graph), the ERK1/2 inhibitor ulixertinib (BVD-523, 0.01-2.5  $\mu$ M, 1:2 dilution) and SCH772984 (ERKi, 0.08-1.25  $\mu$ M, 1:2 dilution) alone or in combination for 120 hr. Bliss synergy scores and dose response curves are calculated as in Figure S2F.
- (D) Pa02C, Pa16C and MIA PaCa-2 cell lines were treated with the vehicle control (lower left of each graph), the pan-RAF inhibitor lifirafenib/BGB-283 (0.01-2.5  $\mu$ M, 1:2 dilution) and SCH772984 (ERKi, 0.08-1.25  $\mu$ M, 1:2 dilution) alone or in combination for 120 hr. Bliss synergy scores and dose response curves are calculated as in Figure S2F.
- (E) *KRAS* mutant PDAC cell lines Pa02C and Pa16C were treated with the vehicle control (lower left of each graph), LY3009120 (RAFi, 0.01-2.5  $\mu$ M, 1:2 dilution) and the ERK1/2 inhibitor LY3214996 (0.08-1.25  $\mu$ M, 1:2 dilution) for 120 hr. Bliss synergy scores and dose response curves are shown as in Figure S2F.
- (F) Kinome-wide chemical proteomics screen by multiplexed kinase inhibitor beads and mass spectrometry (MIB/MS). MIA PaCa-2 cells were treated with the vehicle control DMSO, LY3009120 (RAFi, 0.3  $\mu$ M), trametinib (MEKi, 0.5 nM), SCH772984 (ERKi, 0.04  $\mu$ M) alone or in combination for 72 hr. Fold changes of significantly altered kinases (p value  $\leq$  0.05) are plotted. Each treatment is normalized to its respective vehicle control.
- (G) Average  $\log_2$  fold-change values (over vehicle control) for each kinase identified in MIB/MS were plotted along the x-axis (RAFi+ERKi) or y-axis (RAFi+MEKi). The dashed lines indicate differences in  $\log_2$  fold-change values of 1 or -1.
- (H) Pa16C and PANC-1 cells were treated with LY3009120 (RAFi, 0.3  $\mu$ M, trametinib (MEKi, 0.5 nM) or SCH772984 (ERKi, 0.04  $\mu$ M) alone or in combination as indicated (120 hr). Cell lysates were immunoblotted to determine the levels of phosphorylated and total MEK, ERK, RSK proteins and the loading control vinculin.

Figure S4

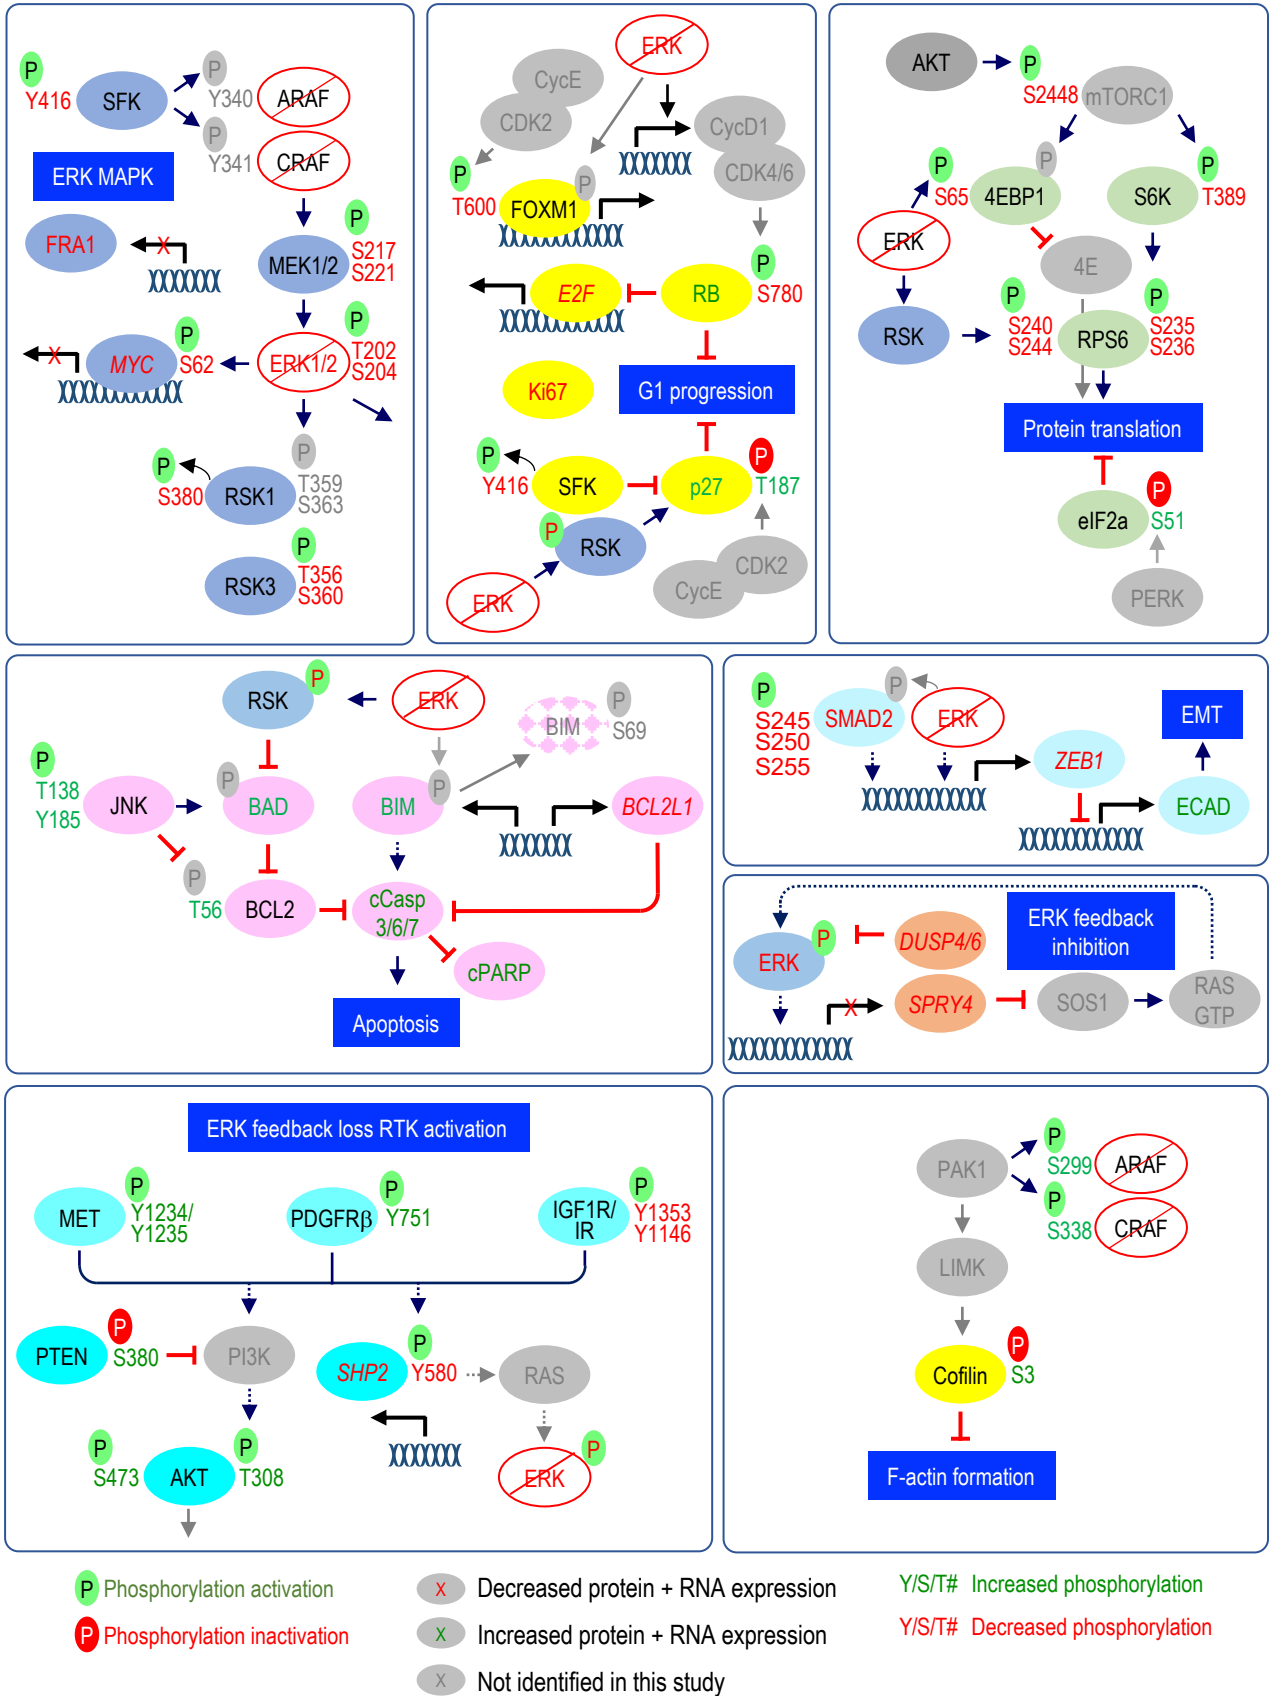

**Figure S4. The pathways altered by the concurrent RAF and ERK inhibition, Related to Figure 3**

The processes altered by LY3009120 (RAFi, 0.3  $\mu$ M) and SCH772984 (ERKi, 0.04  $\mu$ M) combination treatment revealed by reverse phase protein array (RPPA) and RNA sequencing.



Figure S5

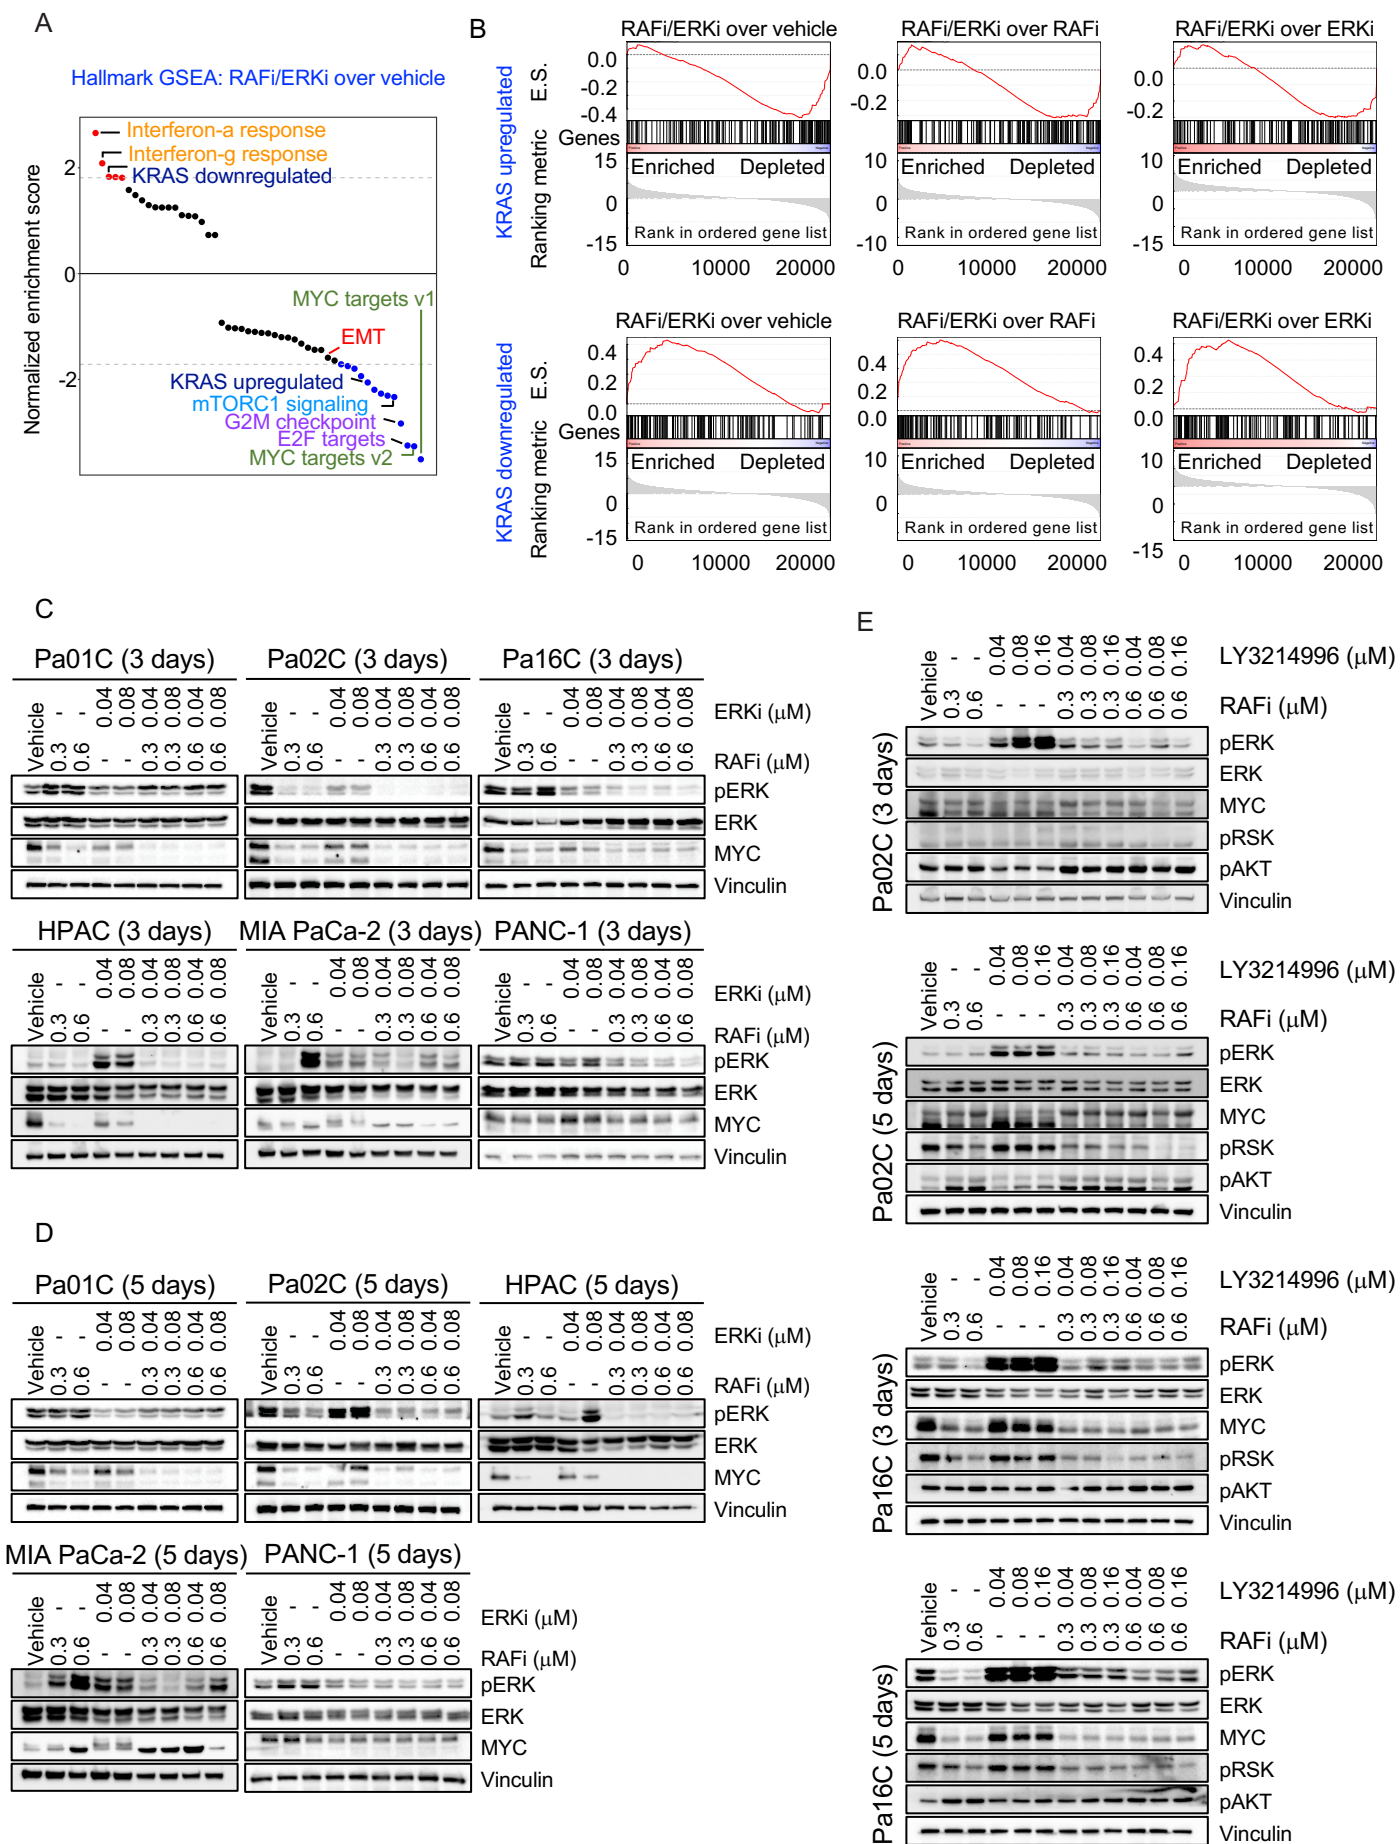

**Figure S5. Concurrent RAF and ERK inhibition Blocks ERK Reactivation, Related to Figure 3**

- (A) Gene set enrichment analysis (GSEA) of RNA transcripts of MIA PaCa-2, Pa02C, Pa14C and Pa16C cell lines. Enriched or depleted gene sets treated with RAFi + ERKi combination compared to the vehicle control DMSO are shown (24 hr).
- (B) Gene set enrichment analysis (GSEA) of hallmark KRAS signaling. Altered gene expressions are plotted as enrichment scores (E.S.). PDAC cells were treated with LY3009120 (RAFi, 0.3  $\mu$ M) and SCH772984 (ERKi, 0.04  $\mu$ M) for 24 hr and normalized to the vehicle control DMSO (left), RAFi (middle), or ERKi (right). Data shown are the average of four PDAC cell lines MIA PaCa-2, Pa02C, Pa14C and Pa16C.
- (C) Indicated *KRAS* mutant PDAC cell lines were treated with the vehicle control DMSO, LY3009120 (RAFi, 0.3 or 0.6  $\mu$ M), SCH772984 (ERKi, 0.04 or 0.08  $\mu$ M) alone or in combination for 72 hr or
- (D) 120 hr. Cell lysates were immunoblotted to determine levels of phosphorylated ERK, total ERK, MYC and vinculin.
- (E) Pa02C and Pa16C cells were treated with the vehicle control DMSO, LY3009120 (RAFi, 0.3 or 0.6  $\mu$ M), the ERK1/2 inhibitor LY3214996 (0.04, 0.08 or 0.16  $\mu$ M) alone or in combination for 72 or 120 hr. Cell lysates were immunoblotted to determine levels of phosphorylated and total ERK, MYC, phosphorylated RSK, phosphorylated AKT and vinculin.

Figure S6

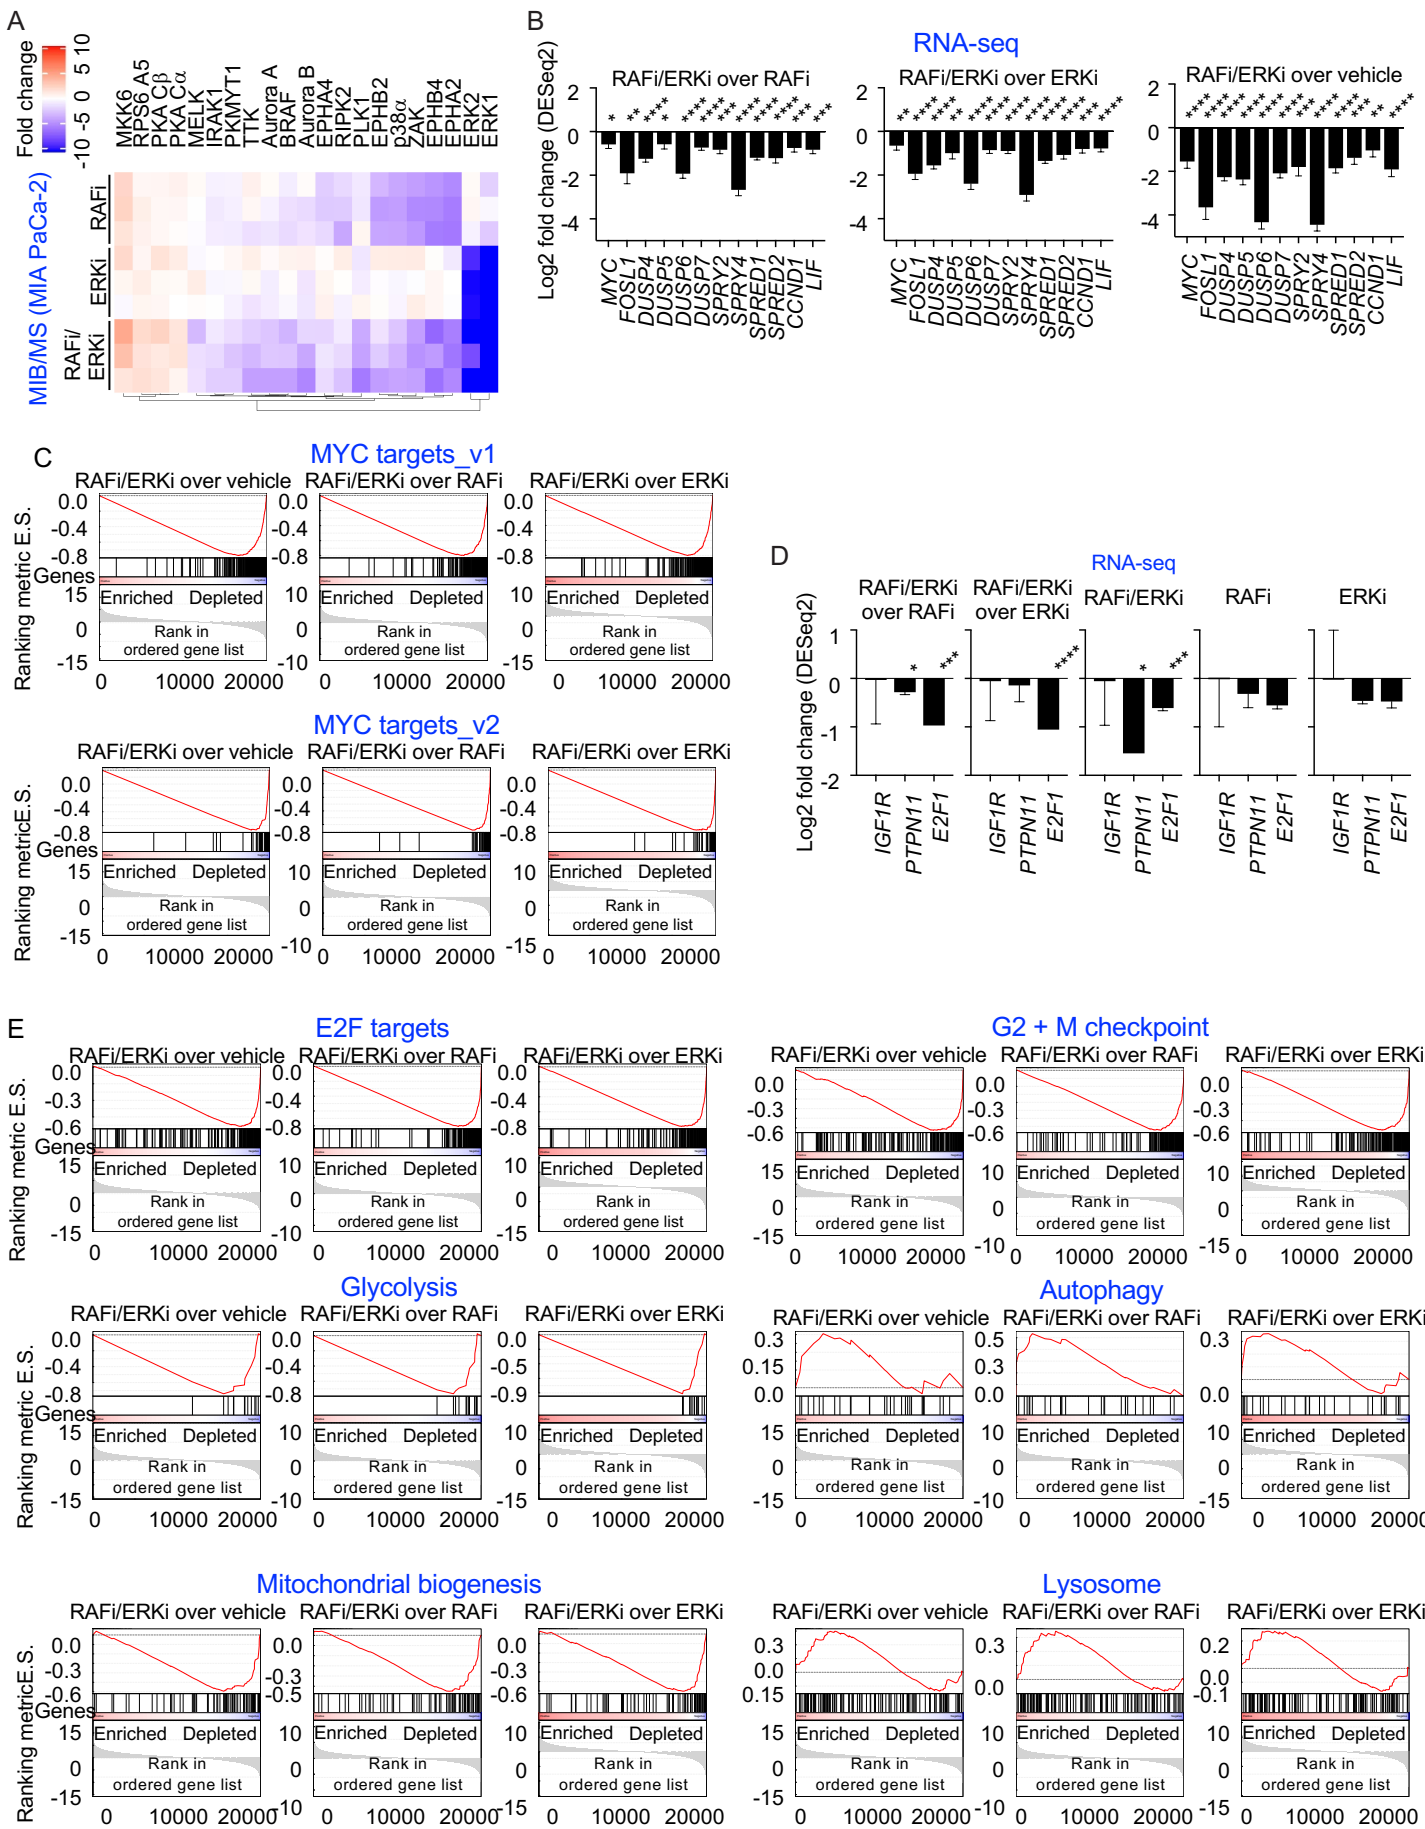

**Figure S6. The alterations of various signaling pathways upon RAF and ERK inhibition, Related to Figure 3**

(A) Kinome-wide chemical proteomics screen by multiplexed kinase inhibitor beads and mass spectrometry (MIB/MS). MIA PaCa-2 cells were treated with the vehicle control DMSO, LY3009120 (RAFi, 0.3  $\mu$ M), SCH772984 (ERKi, 0.04  $\mu$ M) alone or in combination for 72 hr. Fold changes of significantly altered kinases (p value  $\leq$  0.05) are plotted. Each treatment is normalized to its respective vehicle control.

(B) Fold changes (log<sub>2</sub>) of RNA expression of *ERK* gene targets that drive cancer and *ERK* feedback mechanism regulators. MIA PaCa-2, Pa02C, Pa14C and Pa16C cell lines treated with RAFi + ERKi (0.3  $\mu$ M and 0.04  $\mu$ M, respectively) and compared to RAFi (0.3  $\mu$ M), ERKi (0.04  $\mu$ M) or the vehicle control (24 hr). Error bars are shown as standard error. p values are from Wald test. Adjusted p values for RAFi + ERKi compared to RAFi = *MYC* (\*, 0.0161), *FOSL1* (\*\*, 0.0018), *DUSP4* (\*\*\*\*, 1.51E-13), *DUSP5* (\*, 0.0547), *DUSP6* (\*\*\*\*, 8.79E-17), *DUSP7* (\*\*\*\*, 8.90E-07), *SPRY2* (\*\*\*, 0.0002), *SPRY4* (\*\*\*\*, 5.81E-20), *SPRED1* (\*\*\*\*, 2.17E-29), *SPRED2* (\*\*\*\*, 3.05E-06), *CCND1* (\*\*\*, 0.0013), *LIF* (\*\*\*, 0.0003). Adjusted p values for RAFi + ERKi compared to ERKi = *MYC* (\*\*, 0.0112), *FOSL1* (\*\*\*\*, 2.74E-11), *DUSP4* (\*\*\*\*, 6.39E-19), *DUSP5* (\*\*, 0.0019), *DUSP6* (\*\*\*\*, 3.09E-17), *DUSP7* (\*\*\*\*, 5.35E-07), *SPRY2* (\*\*\*\*, 1.80E-12), *SPRY4* (\*\*\*\*, 1.40E-22), *SPRED1* (\*\*\*\*, 1.12E-29), *SPRED2* (\*\*\*\*, 2.67E-07), *CCND1* (\*\*\*, 0.002), *LIF* (\*\*\*\*, 1.96E-05). Adjusted p values for RAFi + ERKi compared to the vehicle = *MYC* (\*\*\*\*, 1.13E-05), *FOSL1* (\*\*\*\*, 5.46E-09), *DUSP4* (\*\*\*\*, 2.91E-36), *DUSP5* (\*\*\*\*, 6.44E-19), *DUSP6* (\*\*\*\*, 1.93E-41), *DUSP7* (\*\*\*\*, 9.59E-20), *SPRY2* (\*\*\*, 0.0001), *SPRY4* (\*\*\*\*, 4.05E-52), *SPRED1* (\*\*\*\*, 2.57E-15), *SPRED2* (\*\*\*\*, 5.69E-05), *CCND1* (\*\*, 0.0039), *LIF* (\*\*\*\*, 6.08E-07).

(C) Gene set enrichment analysis (GSEA) of hallmark MYC targets. Altered gene expressions are plotted as enrichment scores (E.S.). PDAC cells were treated with LY3009120 (RAFi, 0.3  $\mu$ M) and SCH772984 (ERKi, 0.04  $\mu$ M) for 24 hr and normalized to the vehicle control DMSO (left), RAFi (middle), or ERKi (right). Data shown are the average of four PDAC cell lines MIA PaCa-2, Pa02C, Pa14C and Pa16C.

(D) Fold changes (log<sub>2</sub>) of RNA expression of *IGF1R*, *PTPN11* (SHP2) and *E2F1*. MIA PaCa-2, Pa02C, Pa14C and Pa16C cell lines treated with RAFi + ERKi (0.3  $\mu$ M and 0.04  $\mu$ M, respectively) and compared to RAFi (0.3  $\mu$ M), ERKi (0.04  $\mu$ M) or the vehicle control (24 hr). Error bars are shown as standard error. p values are from Wald test. Adjusted p values for RAFi + ERKi compared to RAFi = *IGF1R* (n.s., 0.9064), *PTPN11* (\*, 0.0491), *E2F1* (\*\*\*, 0.0005). Adjusted p values for RAFi + ERKi compared to ERKi = *IGF1R* (n.s., 0.8150), *PTPN11* (n.s., 0.3391), *E2F1* (\*\*\*\*, 2.49E-08). Adjusted p values for RAFi + ERKi compared to the vehicle = *IGF1R* (n.s., 0.9106), *PTPN11* (\*, 0.0538), *E2F1* (\*\*\*, 0.0001). Adjusted p values for RAFi = *IGF1R* (n.s., 0.9828), *PTPN11* (n.s., 0.2844), *E2F1* (n.s., 0.0713). Adjusted p values for ERKi = *IGF1R* (n.s., 0.9916), *PTPN11* (n.s., 0.0608), *E2F1* (n.s., 0.1325).

(E) Gene set enrichment analysis (GSEA) of hallmark E2F targets, G2M checkpoint, glycolysis, autophagy, mitochondrial biogenesis, and lysosome. Altered gene expressions are plotted as enrichment scores (E.S.). PDAC cells were treated with LY3009120 (RAFi, 0.3  $\mu$ M) and SCH772984 (ERKi, 0.04  $\mu$ M) for 24 hr and normalized to the vehicle control DMSO (left), RAFi (middle), or ERKi (right). Data shown are the average of four PDAC cell lines MIA PaCa-2, Pa02C, Pa14C and Pa16C.

Figure S7

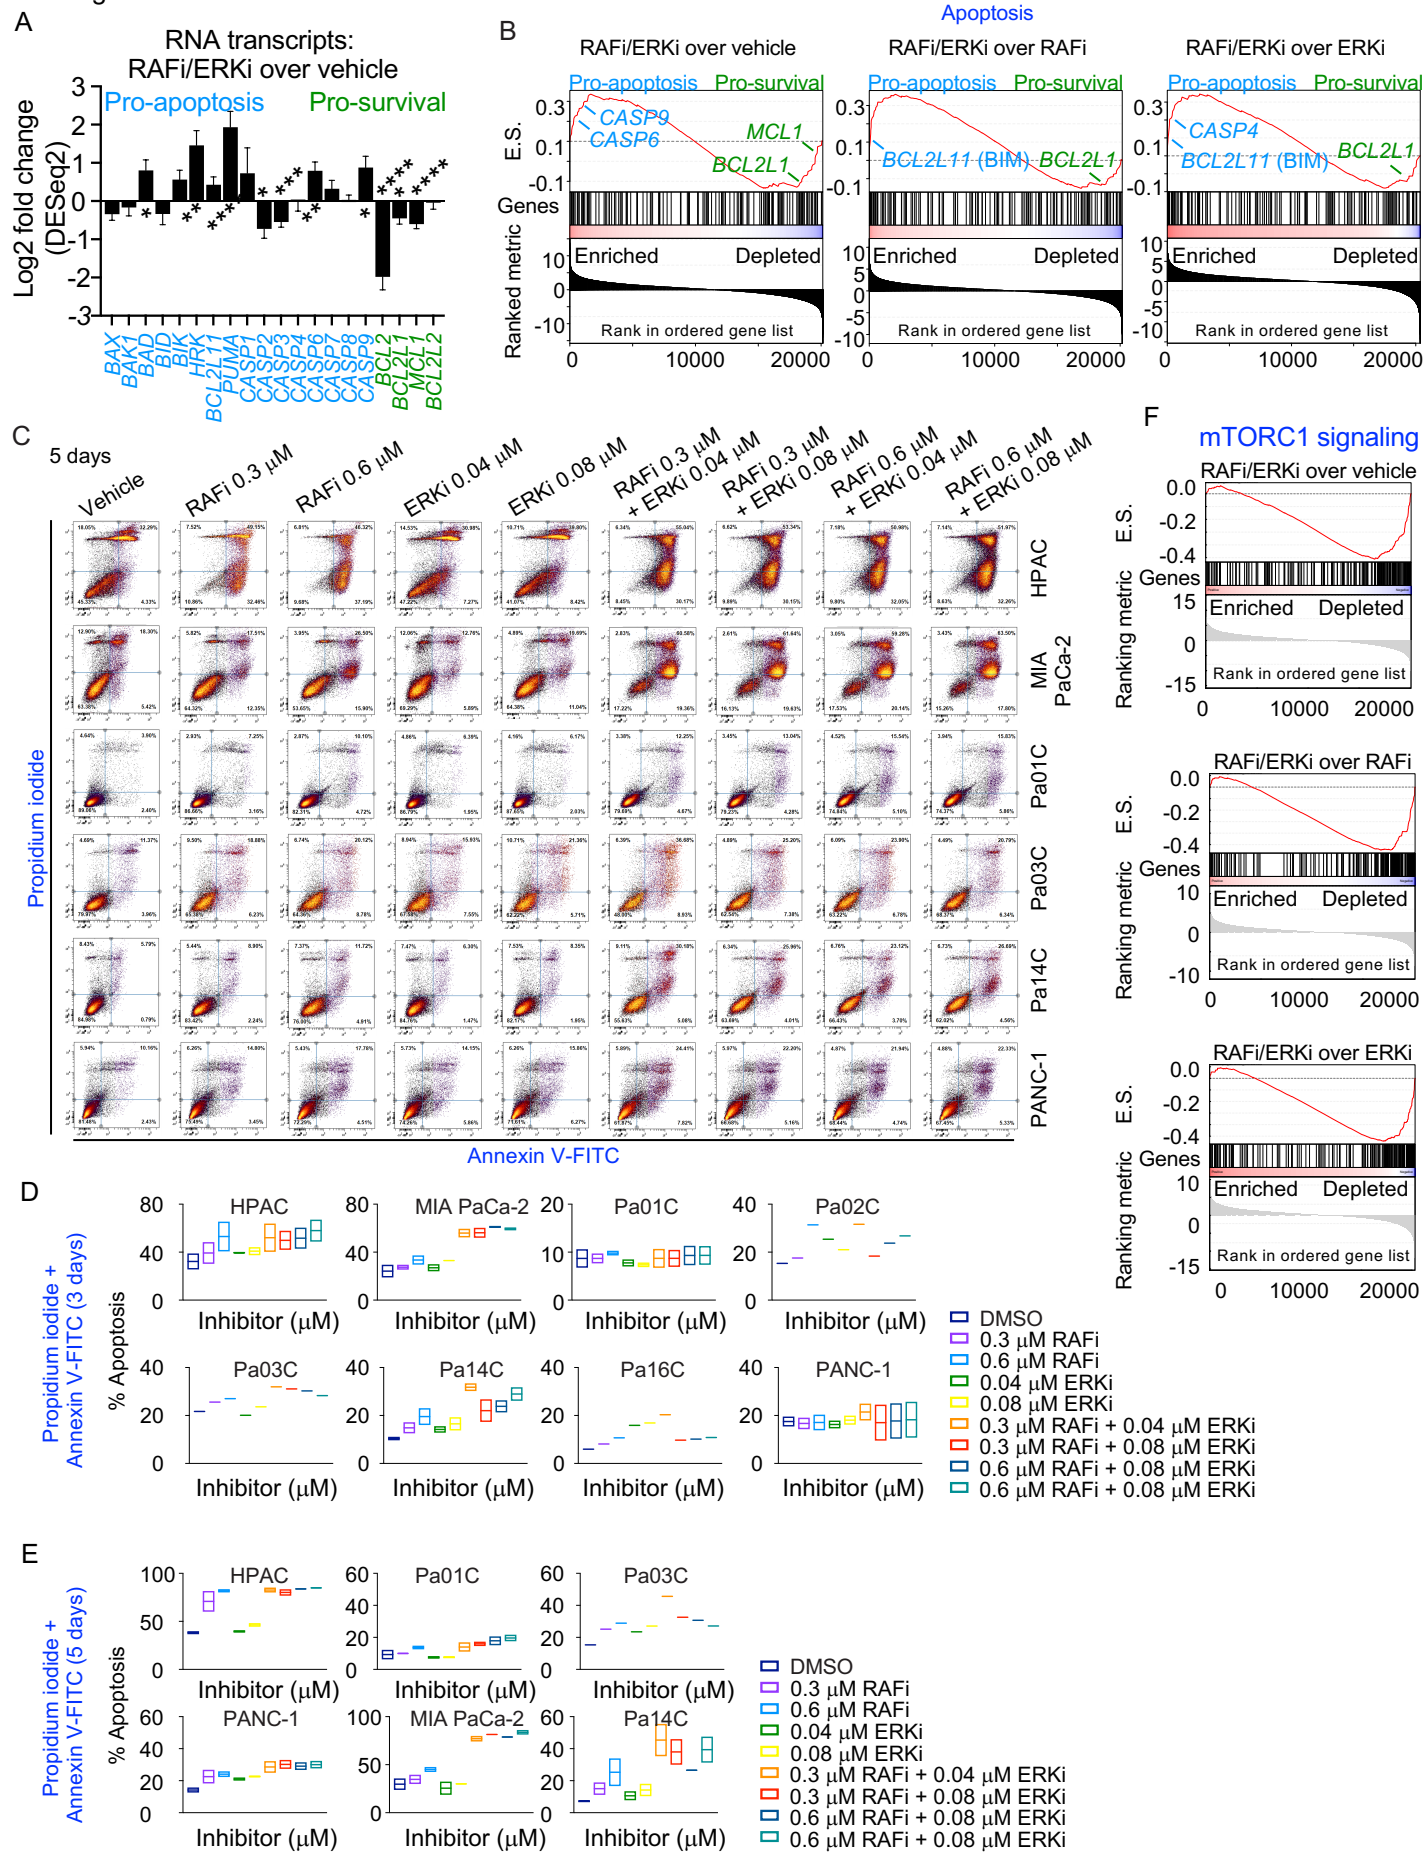

### Figure S7. Concurrent RAF and ERK Inhibition Induces Apoptosis, Related to Figure 4

(A) Fold changes (log<sub>2</sub>) of RNA expression of pro-apoptosis and pro-survival genes as the averaged values of MIA PaCa-2, Pa02C, Pa14C and Pa16C cell lines treated with RAFi + ERKi (0.3 μM and 0.04 μM, respectively) and compared to the vehicle control DMSO (24 hr). Error bars are shown as standard error. All p values shown are in comparison to the vehicle control. p values are from Wald test. Adjusted p values = *BAX* (0.1030), *BAK1* (0.6372), *BAD* (\*, 0.0195), *BID* (0.4139), *BIK* (0.0835), *HRK* (\*\*, 0.0016), *BCL2L11* (0.1258), *PUMA/BBC3* (\*\*\*\*, 5.78E-05), *CASP1* (0.4693), *CASP2* (\*, 0.0170), *CASP3* (\*\*\*, 0.0008), *CASP4* (0.9750), *CASP6* (\*\*, 0.0050), *CASP7* (0.2896), *CASP8* (0.8912), *CASP9* (\*, 0.0158), *BCL2* (\*\*\*\*, 2.83E-07), *BCL2L1* (\*, 0.0171), *MCL1* (\*\*\*\*, 1.13E-05), *BCL2L2* (0.8906).

(B) GSEA of hallmark apoptosis signaling. Altered gene expressions are plotted as E.S. (enrichment score) PDAC cells were treated with LY3009120 (RAFi, 0.3 μM) and SCH772984 (ERKi, 0.04 μM) for 24 hr and normalized to the vehicle control (left), RAFi (middle), or ERKi (right). Data are the average of four PDAC cell lines MIA PaCa-2, Pa02C, Pa14C and Pa16C.

(C) Related to Figure 4D. Representative images of percent apoptosis induced by the vehicle control, LY3009120 (RAFi, 0.3 or 0.6 μM), SCH772984 (ERKi, 0.04 or 0.08 μM) or the combinations (120 hr). FACS analysis of Annexin-V/propidium iodide labeled cells was used to measure apoptosis.

(D) Quantitation of percent apoptosis of the indicated *KRAS* mutant PDAC cells treated with the vehicle control, LY3009120 (RAFi, 0.3 or 0.6 μM), SCH772984 (ERKi, 0.04 or 0.08 μM) or the combinations for 72 hr or

(E) 120 hr. FACS analysis of Annexin V-FITC/propidium iodide-labeled cells was used to measure apoptosis.

(F) Gene set enrichment analysis (GSEA) of hallmark mTORC1 signaling. Altered gene expressions are plotted as enrichment scores (E.S.). PDAC cells were treated with LY3009120 (RAFi, 0.3 μM) and SCH772984 (ERKi, 0.04 μM) for 24 hr and normalized to the vehicle control DMSO (upper graph), RAFi (middle graph), or ERKi (lower graph). Data are the average of four PDAC cell lines MIA PaCa-2, Pa02C, Pa14C and Pa16C.



Figure S8

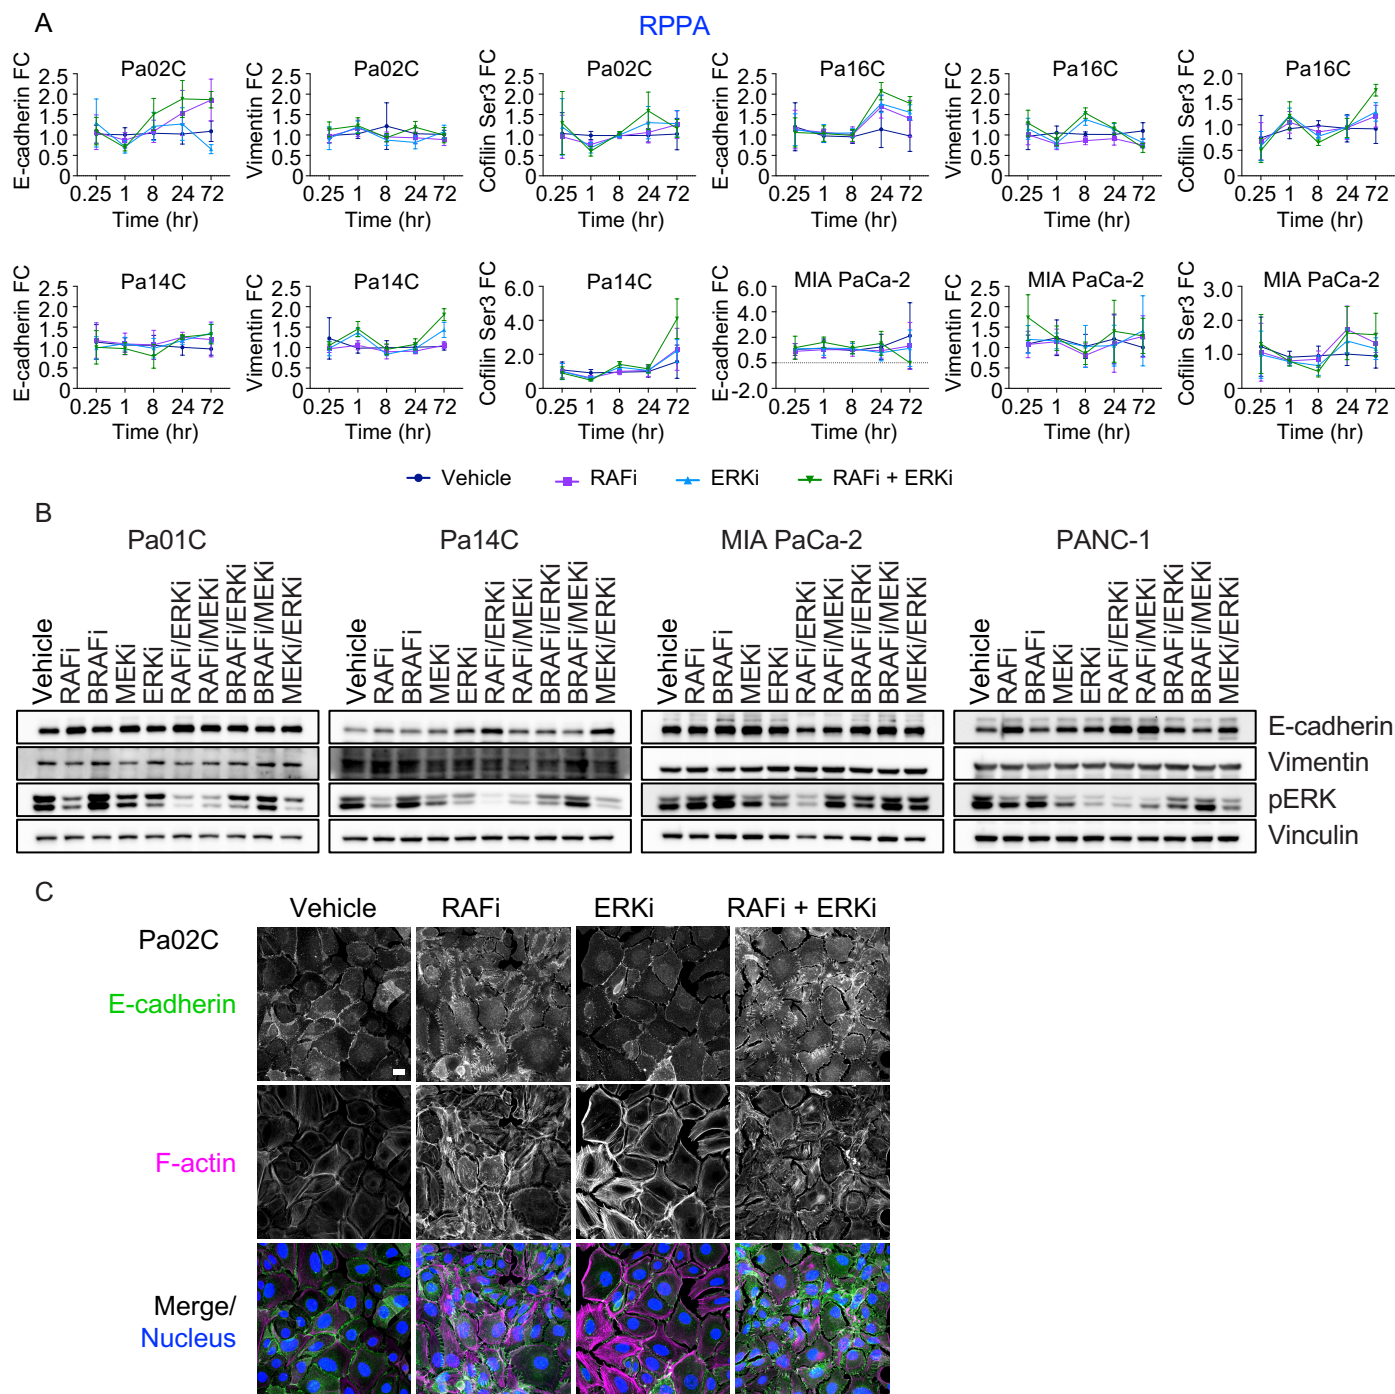

**Figure S8. Combined RAF and ERK Inhibition Causes Mesenchymal to Epithelial Transition, Related to Figure 5**

(A) RPPA. PDAC cells were treated with the vehicle control, LY3009120 (RAFi, 0.3  $\mu$ M), SCH772984 (ERKi, 0.04  $\mu$ M) or the combination for 15 min, 1, 8, 24 and 72 hr. The alterations of protein expression of E-cadherin (epithelial marker), vimentin (mesenchymal marker) and phosphorylated cofilin (actin polymerization) were plotted over time. Data are the mean average of five independent experiments. Error bars are shown as  $\pm$ S.E.M. FC: fold change.

(B) Pa01C, Pa14C, MIA PaCa-2 and PANC-1 cells were treated with LY3009120 (RAFi, 0.3  $\mu$ M), vemurafenib (BRAFi, 1  $\mu$ M), trametinib (MEKi, 0.5 nM) or SCH772984 (ERKi, 0.04  $\mu$ M) alone or in combination as indicated (120 hr). Cell lysates were immunoblotted to determine the levels of E-cadherin, vimentin, phosphorylated ERK and vinculin.

(C) Related to Figure 5C. Representative images (the same representative image shown in Figure 5C as E-cadherin and nucleus merge) of Pa02C cells treated with vehicle control, LY3009120 (RAFi, 0.3  $\mu$ M), SCH772984 (ERKi, 0.04  $\mu$ M) or the combination to visualize F-actin (shown alone or merged with E-cadherin and DAPI) expression and distribution (72 hr). Scale bar, 20  $\mu$ m.

Figure S9

A

## Calcein AM growth inhibition assay (5 days)

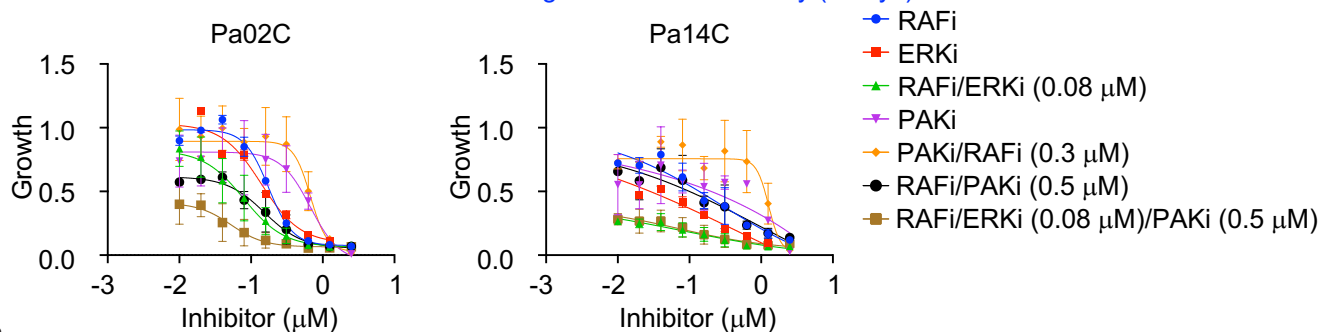

B

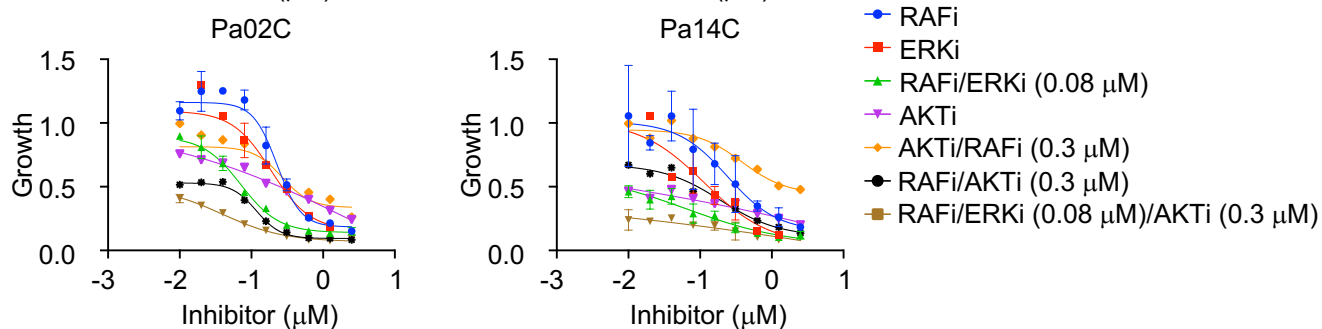

C

## Calcein AM growth inhibition assay (5 days)

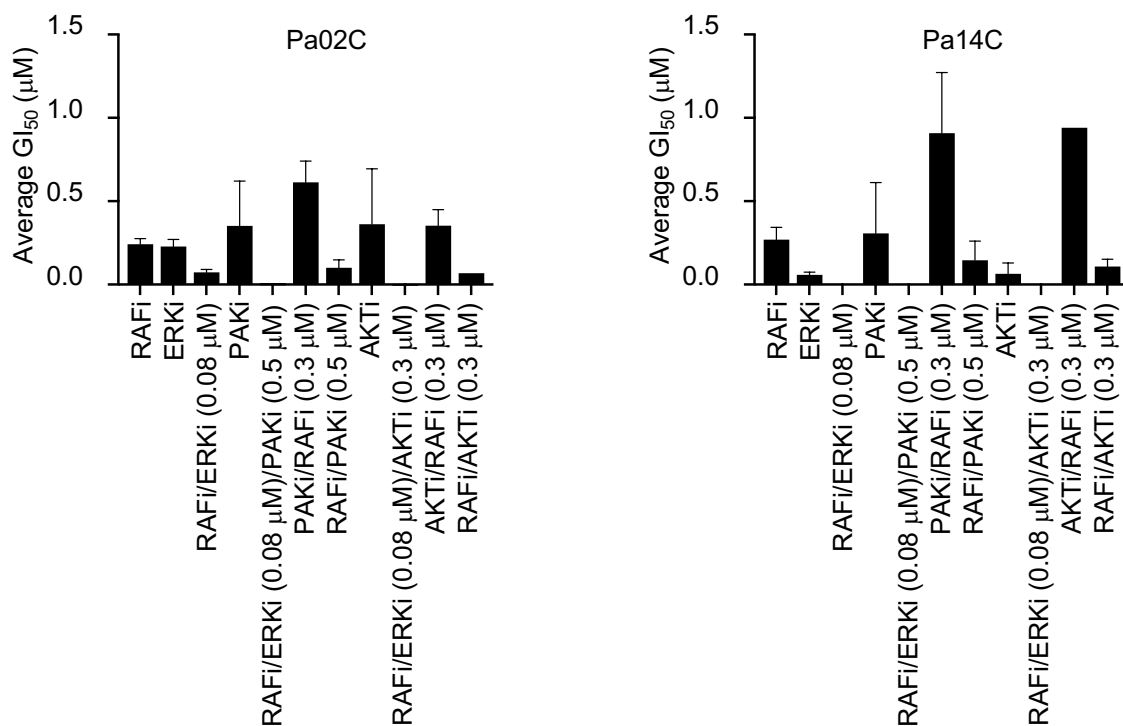**Figure S9. Concurrent PAK or AKT Inhibition Enhances RAFi/ERKi Activity, Related to Figure 6**

(A) Pa02C and Pa14C cell lines were treated with LY3009120 (RAFi, 0.01-2.5  $\mu\text{M}$ ), SCH772984 (ERKi, 0.08-1.25  $\mu\text{M}$ ), FRAX597 (PAKi, 0.01-2.5  $\mu\text{M}$ ) alone or the combination with a constant concentration of a second or third inhibitor as indicated. Proliferation was measured after 120 hr by Calcein AM cell viability assay. Data are the mean average of two independent experiments. Error bars are shown as  $\pm$ S.E.M.

(B) Pa02C and Pa14C cell lines were treated with LY3009120 (RAFi, 0.01-2.5  $\mu\text{M}$ ), SCH772984 (ERKi, 0.08-1.25  $\mu\text{M}$ ), MK2206 (AKTi, 0.01-2.5  $\mu\text{M}$ ) alone or the combination with a constant concentration of a second or third inhibitor as indicated. Proliferation was measured after 120 hr by Calcein AM cell viability assay. Data are the mean average of two independent experiments. Error bars are shown as  $\pm$ S.E.M.

(C) Average  $\text{GI}_{50}$  values for the data described in Figures S9A and S9B.

Figure S10

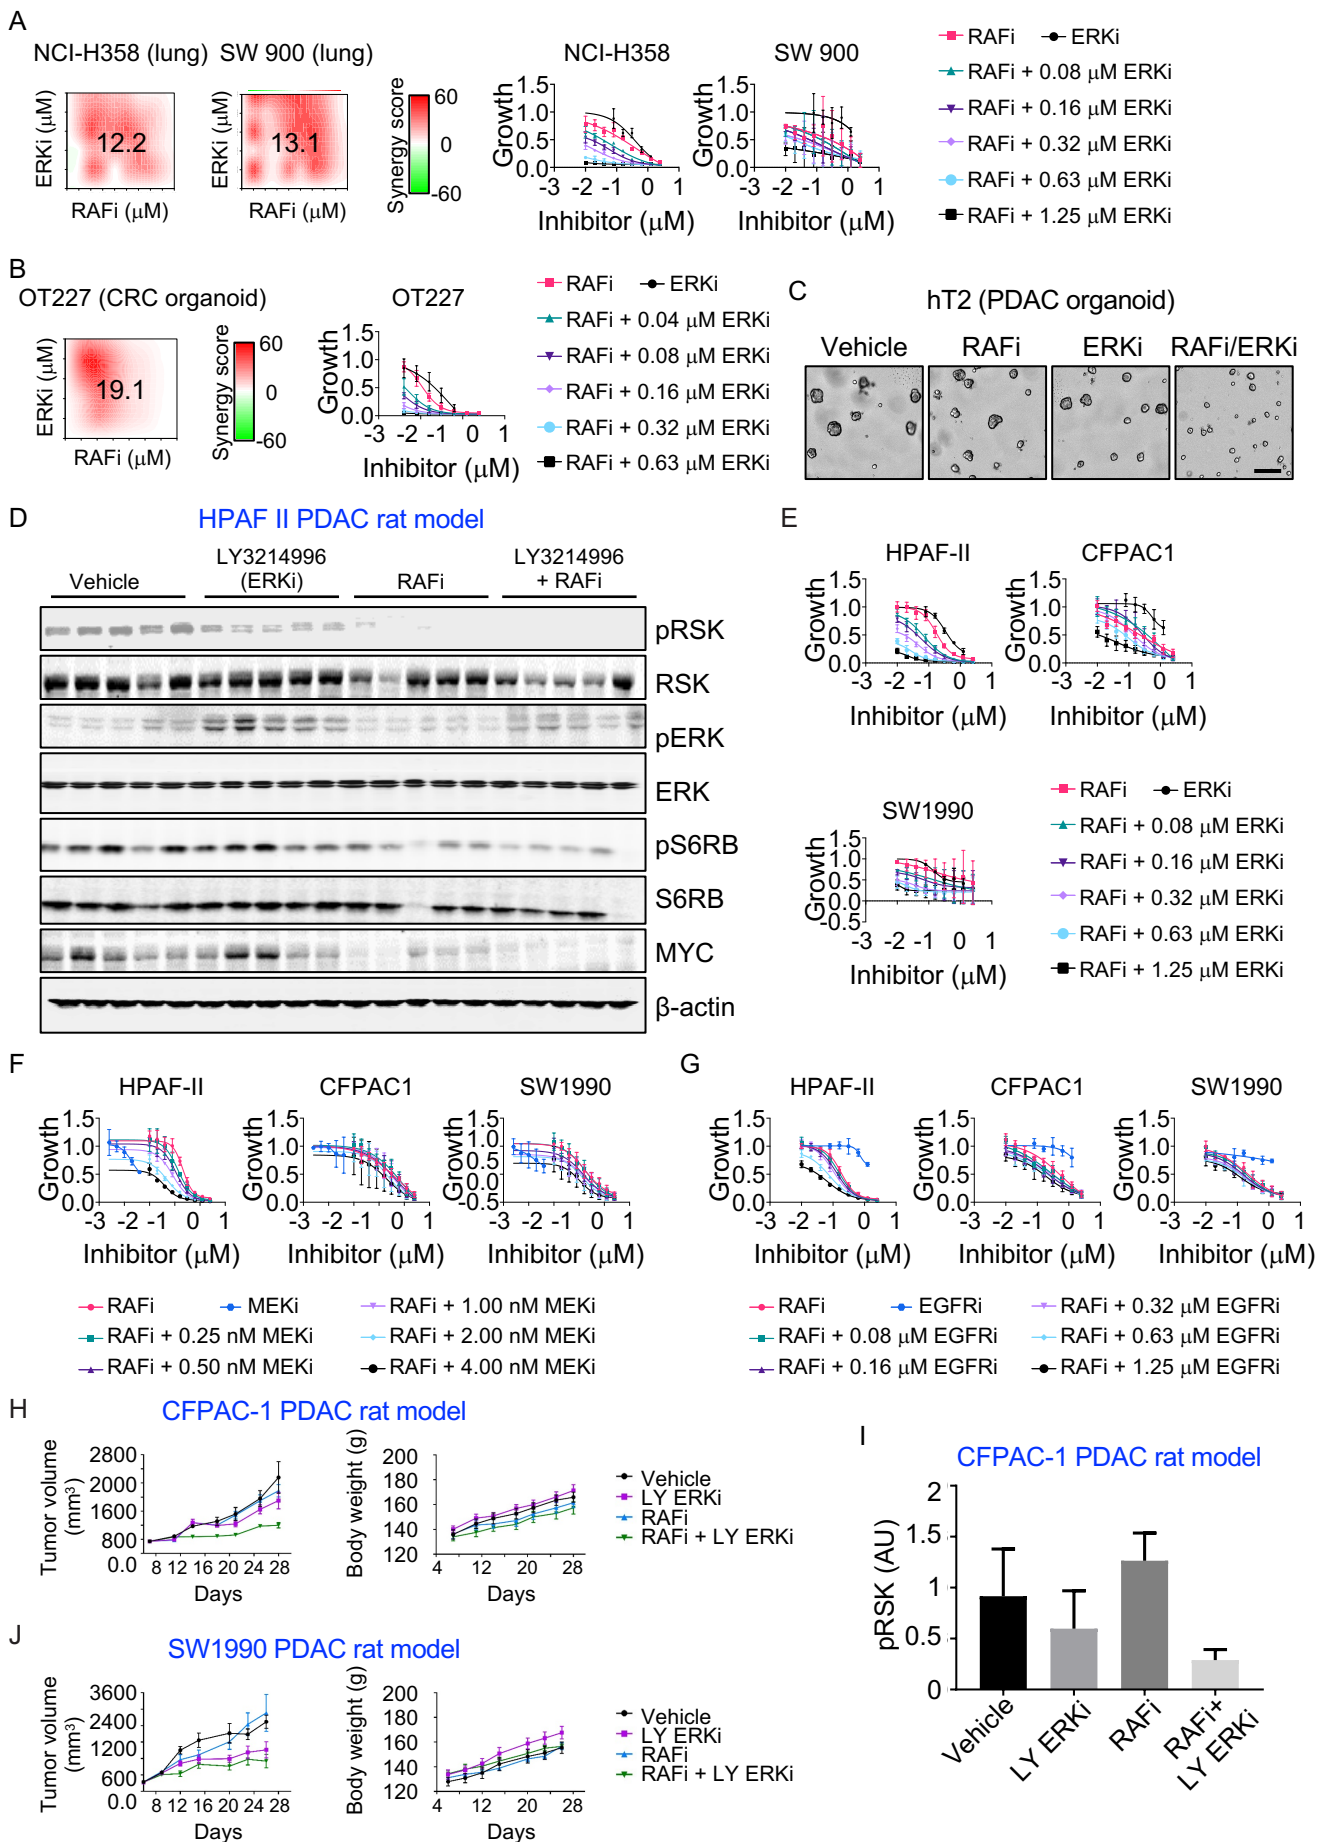

**Figure S10. Concurrent RAF and ERK Inhibition Synergistically Impairs KRAS mutant cancer growth *in vitro* and *in vivo*, Related to Figure 7**

(A) *KRAS* mutant lung cancer cell lines NCI-H358 and SW 900 were treated with the vehicle control (lower left of each graph), LY3009120 (RAFi, 0.01-2.5  $\mu$ M) and SCH772984 (ERKi, 0.08-1.25  $\mu$ M) alone or in combination for 120 hr. Proliferation was measured by Calcein AM cell viability assay. Representative bliss synergy score heatmaps for three independent experiments is shown (left). Red (synergy), green (antagonism), white (no effect). Averaged synergy scores presented on the synergy heatmaps. Averaged dose response curves of three independent experiments are shown (right). Error bars are  $\pm$ S.E.M.

(B) *KRAS* mutant CRC organoids OT227 were treated with the vehicle control (lower left of each graph), LY3009120 (RAFi, 0.01-2.5  $\mu$ M) and SCH772984 (ERKi, 0.04-0.63  $\mu$ M) alone or in combination for 5 days. Proliferation was measured by CellTiter-Glo 3D cell viability assay. Dose response curves and bliss synergy scores were calculated and represented as in Figure S10A.

(C) Representative images of PDAC organoid hT2 treated with the vehicle control DMSO, LY3009120 (RAFi, 0.16  $\mu$ M), SCH772984 (ERKi, 0.04  $\mu$ M) alone or in combination. Scale bar = 200  $\mu$ m.

(D) Tumors from HPAF-II PDAC rat (n = 5 for each condition) were harvested at day 21. Tumor lysates were immunoblotted to determine levels of phosphorylated and total RSK, phosphorylated and total ERK, phosphorylated ribosomal protein S6 (S240/244), total ribosomal protein S6, MYC and B-actin (control for total protein).

(E) The indicated PDAC cell lines were treated with LY3009120 (RAFi, 0.01-2.5  $\mu$ M) and SCH772984 (ERKi, 0.08-1.25  $\mu$ M) alone or in combination for 120 hr. Proliferation was measured by Calcein AM cell viability assay. Averaged dose response curves of three independent experiments are shown. Error bars are  $\pm$ S.E.M.

(F) The indicated PDAC cell lines were treated with LY3009120 (RAFi, 0.01-2.5  $\mu$ M) and trametinib (MEKi, 0.25 - 4.00  $\mu$ M) alone or in combination for 120 hr. Proliferation was measured by Calcein AM cell viability assay. Averaged dose response curves of three independent experiments are shown. Error bars are  $\pm$ S.E.M.

(G) The indicated PDAC cell lines were treated with LY3009120 (RAFi, 0.01-2.5  $\mu$ M) and erlotinib (EGFRi, 0.08-1.25  $\mu$ M) alone or in combination for 120 hr. Proliferation was measured by Calcein AM cell viability assay. Averaged dose response curves of three independent experiments are shown. Error bars are  $\pm$ S.E.M.

(H) Relative tumor volume of the NIH nude rats with implanted CFPAC-1 cells were treated with LY3009120 (RAFi, 20 mpk, BID) alone or in combination with ERK1/2 inhibitor LY3214996 (LY ERKi, 10 mpk, QD) for 36 days (left). Body weight changes are shown (right).

(I) Quantitation of the western blot analysis to determine the levels of phosphorylated RSK of tumor lysates (n = 5 animals per group).

(J) Relative tumor volume of the NIH nude rats with implanted SW 1990 cells were treated with LY3009120 (RAFi, 20 mpk, BID) alone or in combination with ERK1/2 inhibitor LY3214996 (LY ERKi, 10 mpk, QD) for 36 days (left). Body weight changes are shown (right).
